# Supplementary material for: Revealing New Mouse Epicardial Cell Markers through Transcriptomics
Source: PLoS One. 2010 Jun 28;5(6):e11429. doi: 10.1371/journal.pone.0011429 (PMC2893200; doi:10.1371/journal.pone.0011429)
Supplement: Table S4 — GO analysis of downregulated epicardial signature genes after myocardial infarction. Analysis of genes with a p-value cut off of 0.005. (0.01 MB XLS) [file pone.0011429.s007.xls]

## Sheet: Down in Epic. after infarct
GOID	Ontology	Term	q	p
GO:0006957	biological_process	complement activation, alternative pathway	2	8.66166e-06
GO:0045087	biological_process	innate immune response	3	0.000406638
GO:0002541	biological_process	activation of plasma proteins involved in acute inflammatory response	2	0.000905845
GO:0006956	biological_process	complement activation	2	0.000905845
GO:0006959	biological_process	humoral immune response	2	0.00171859
GO:0042346	biological_process	positive regulation of NF-kappaB import into nucleus	1	0.00208248
GO:0042993	biological_process	positive regulation of transcription factor import into nucleus	1	0.00292077
GO:0010039	biological_process	response to iron ion	1	0.00315154
GO:0002526	biological_process	acute inflammatory response	2	0.00368646
GO:0051605	biological_process	protein processing by peptide bond cleavage	2	0.00368646
GO:0031294	biological_process	lymphocyte costimulation	1	0.00368646
GO:0031295	biological_process	T cell costimulation	1	0.00368646
GO:0042345	biological_process	regulation of NF-kappaB import into nucleus	1	0.00403731
GO:0002253	biological_process	activation of immune response	2	0.00413107
GO:0008272	biological_process	sulfate transport	1	0.00413107
GO:0042307	biological_process	positive regulation of protein import into nucleus	1	0.00433886
