# Supplementary material for: Revealing New Mouse Epicardial Cell Markers through Transcriptomics
Source: PLoS One. 2010 Jun 28;5(6):e11429. doi: 10.1371/journal.pone.0011429 (PMC2893200; doi:10.1371/journal.pone.0011429)
Supplement: Table S6 — List of mIGF-1 epicardial signature genes. (0.09 MB XLS) [file pone.0011429.s009.xls]

## Sheet: Sheet1
Fold Difference	Gene Symbol	Gene Description
107.6	Gpm6a	glycoprotein m6a
75.41	Upk3b	uroplakin 3B
66.99	2610018G03Rik	RIKEN cDNA 2610018G03 gene
59.46	Sulf1	sulfatase 1
49.64	Efemp1	epidermal growth factor-containing fibulin-like extracellular matrix protein 1
45.23	Dmkn	dermokine
43.96	Pik3cd	phosphatidylinositol 3-kinase catalytic delta polypeptide
43.11	Ptbp1	polypyrimidine tract binding protein 1
39.82	Aldh1a2	aldehyde dehydrogenase family 1, subfamily A2
38.26	Prr15	proline rich 15
37.47	E430024C06Rik	RIKEN cDNA E430024C06 gene
35.87	Gpm6a	glycoprotein m6a
35.77	Saa3	serum amyloid A 3
35.11	C2	complement component 2 (within H-2S)
34.41	Ptprk	protein tyrosine phosphatase, receptor type, K
33.51	Ildr2	immunoglobulin-like domain containing receptor 2
33.23	Hpgd	hydroxyprostaglandin dehydrogenase 15 (NAD)
31.34	Upk1b	uroplakin 1B
30.63	Slc39a8	solute carrier family 39 (metal ion transporter), member 8
30.04	Rbbp8	retinoblastoma binding protein 8
28.5	Upk1b	uroplakin 1B
27.94	Tmem98	transmembrane protein 98
27.13	Polr3k	Polymerase (RNA) III (DNA directed) polypeptide K (Polr3k), mRNA
26.58	Sulf1	sulfatase 1
26.4	Rhobtb3	Rho-related BTB domain containing 3
26.19	Nrip2	nuclear receptor interacting protein 2
26.18	Ptgs1	prostaglandin-endoperoxide synthase 1
25.8	Cryl1	crystallin, lambda 1
25.67	1700003E16Rik	RIKEN cDNA 1700003E16 gene
	Sema3c	sema domain, immunoglobulin domain (Ig), short basic domain, secreted, (semaphorin) 3C
24.89
24.87	Krt8	keratin 8
24.1	Upk1b	uroplakin 1B
23.89	Golm1	golgi membrane protein 1
22.52	H2-T10 /// H2-T17 /// H2-T22 /// H2-T9	histocompatibility 2, T region locus 10 /// histocompatibility 2, T region locus 17 /// histocompatibility 2, T region locus 22 /// histocompatibility 2, T region locus 9
22.28	Krt8	keratin 8
22.26	1110069O07Rik	RIKEN cDNA 1110069O07 gene
21.95	Cd2ap	CD2-associated protein
21.93	Cyp2s1	cytochrome P450, family 2, subfamily s, polypeptide 1
21.43	Sbsn	suprabasin
21.35	Upk3b	uroplakin 3B
21.3	Laptm5	lysosomal-associated protein transmembrane 5
20.34	Slc9a3r1	solute carrier family 9 (sodium/hydrogen exchanger), member 3 regulator 1
20.27	EG620313 /// Tbca	predicted gene, EG620313 /// tubulin cofactor A
20.22	Slc9a3r1	solute carrier family 9 (sodium/hydrogen exchanger), member 3 regulator 1
20.05	Marcksl1	MARCKS-like 1
19.92	Krt8	keratin 8
19.25	Lrrn4	leucine rich repeat neuronal 4
19.22	Armc8	armadillo repeat containing 8
19.08	Rabgap1l	RAB GTPase activating protein 1-like
19.07	Gfpt2	glutamine fructose-6-phosphate transaminase 2
19.06	Sema6c	sema domain, transmembrane domain (TM), and cytoplasmic domain, (semaphorin) 6C
18.97	Mpzl2	myelin protein zero-like 2
18.63	Cacng7	calcium channel, voltage-dependent, gamma subunit 7
18.52	Frmd4b	FERM domain containing 4B
18.29	Tmem38b	transmembrane protein 38B
18.27	Bnc1	basonuclin 1
18.12	Anxa8	annexin A8
18.09	Epb4.1l3	erythrocyte protein band 4.1-like 3
17.37	Aldh1a1	aldehyde dehydrogenase family 1, subfamily A1
17.12	Pom121	nuclear pore membrane protein 121
16.76	Igfbp6	insulin-like growth factor binding protein 6
16.25	Ccdc22	coiled-coil domain containing 22
16.24	Sbsn	suprabasin
16.01	Abcb1b	ATP-binding cassette, sub-family B (MDR/TAP), member 1B
15.87	Slc9a3r1	solute carrier family 9 (sodium/hydrogen exchanger), member 3 regulator 1
15.77	Aldh2	aldehyde dehydrogenase 2, mitochondrial
15.77	Cxcl1	chemokine (C-X-C motif) ligand 1
15.72	Nkain4	Na+/K+ transporting ATPase interacting 4
15.47	Msln	mesothelin
15.2	2310007J06Rik	RIKEN cDNA 2310007J06 gene
15.15	Fen1	flap structure specific endonuclease 1
15.06	Arhgef12	Rho guanine nucleotide exchange factor (GEF) 12
15.05	Tmem214	transmembrane protein 214
15	Dusp11	dual specificity phosphatase 11 (RNA/RNP complex 1-interacting)
14.99	Gbp2	guanylate binding protein 2
14.98	Zdhhc14	zinc finger, DHHC domain containing 14
14.84	Prg4	proteoglycan 4 (megakaryocyte stimulating factor, articular superficial zone protein)
14.68	Kalrn	kalirin, RhoGEF kinase
14.61	Gm98	gene model 98, (NCBI)
14.52	Shh	sonic hedgehog
14.48	Ezr	ezrin
14.39	Flrt2	fibronectin leucine rich transmembrane protein 2
14.31	Pawr	PRKC, apoptosis, WT1, regulator
14.29	Krt19	keratin 19
14.16	Srr	serine racemase
13.88	Dpp4	dipeptidylpeptidase 4
13.72	Cdh11	cadherin 11
13.43	Rab8b	RAB8B, member RAS oncogene family
13.36	Aph1a	anterior pharynx defective 1a homolog (C. elegans)
13.26	---	---
13.19	Med18	mediator of RNA polymerase II transcription, subunit 18 homolog (yeast)
13.13	Slc38a1	solute carrier family 38, member 1
13.04	Spata13	spermatogenesis associated 13
12.72	---	---
12.64	Samhd1	SAM domain and HD domain, 1
12.62	Vat1	vesicle amine transport protein 1 homolog (T californica)
12.36	Ppig	peptidyl-prolyl isomerase G (cyclophilin G)
12.33	Il18	interleukin 18
12.33	Upk1b	uroplakin 1B
12.1	Krt18	keratin 18
12.02	Arhgef12	Rho guanine nucleotide exchange factor (GEF) 12
11.97	Ifih1	interferon induced with helicase C domain 1
11.93	Tex261	testis expressed gene 261
11.77	Cfh /// LOC100048018	complement component factor h /// similar to complement component factor H
11.75	Krt7	keratin 7
11.71	Muc16	mucin 16
11.7	Skap2	src family associated phosphoprotein 2
11.34	Adar	adenosine deaminase, RNA-specific
11.32	Pa2g4	proliferation-associated 2G4
11.29	Gpr64	G protein-coupled receptor 64
11.23	Sf3b4	splicing factor 3b, subunit 4
11.22	Ptprf	protein tyrosine phosphatase, receptor type, F
11.2	Sfrs6	splicing factor, arginine/serine-rich 6
11.03	2610016E04Rik /// Mup1 /// Mup2	RIKEN cDNA 2610016E04 gene /// major urinary protein 1 /// major urinary protein 2
11	Bace2	beta-site APP-cleaving enzyme 2
10.91	Aldh2	aldehyde dehydrogenase 2, mitochondrial
10.81	Ezr	ezrin
10.77	Spem1	sperm maturation 1
10.74	Laptm4b	lysosomal-associated protein transmembrane 4B
10.74	Slco2a1	solute carrier organic anion transporter family, member 2a1
10.7	---	---
10.64	6330406I15Rik	RIKEN cDNA 6330406I15 gene
10.5	Scd1	stearoyl-Coenzyme A desaturase 1
10.48	Met	met proto-oncogene
10.45	100039339 /// 100039507 /// 100040033 /// 100040034 /// 100041612 /// 100042124 /// 100042177 /// 100042523 /// LOC100045906 /// LOC100046656 /// OTTMUSG00000011313	predicted gene, 100039339 /// predicted gene, 100039507 /// predicted gene, 100040033 /// predicted gene, 100040034 /// predicted gene, 100041612 /// predicted gene, 100042124 /// predicted gene, 100042177 /// predicted gene, 100042523 /// similar to cyclic nucleotide gated channel beta 1 /// similar to pol protein /// predicted gene, OTTMUSG00000011313
10.42	Snhg10	small nucleolar RNA host gene (non-protein coding) 10
10.39	Calm3	Calmodulin III (Calm3) mRNA, 3' untranslated region
10.37	AI987944 /// AW146154	expressed sequence AI987944 /// expressed sequence AW146154
10.28	Cd200	CD200 antigen
10.23	Cldn15	claudin 15
10.17	Ppl	periplakin
10.14	Tspan8	tetraspanin 8
10.12	Ano1	anoctamin 1, calcium activated chloride channel
10.04	Adrm1	adhesion regulating molecule 1
9.953	Tgfb2	transforming growth factor, beta 2
9.91	4930563E22Rik	RIKEN cDNA 4930563E22 gene
9.86	Slc2a13	solute carrier family 2 (facilitated glucose transporter), member 13
9.65	Sema3d	sema domain, immunoglobulin domain (Ig), short basic domain, secreted, (semaphorin) 3D
9.6	Gbp2	guanylate binding protein 2
9.429	Ywhaq	tyrosine 3-monooxygenase/tryptophan 5-monooxygenase activation protein, theta polypeptide
9.421	Rassf1	Ras association (RalGDS/AF-6) domain family member 1
9.258	Slc31a2	solute carrier family 31, member 2
9.239	Itm2a	integral membrane protein 2A
9.148	Cpa3	carboxypeptidase A3, mast cell
9.124	Pcdhga1 /// Pcdhga10 /// Pcdhga11 /// Pcdhga12 /// Pcdhga2 /// Pcdhga3 /// Pcdhga4 /// Pcdhga5 /// Pcdhga6 /// Pcdhga7 /// Pcdhga8 /// Pcdhga9 /// Pcdhgb1 /// Pcdhgb2 /// Pcdhgb4 /// Pcdhgb5 /// Pcdhgb6 /// Pcdhgb7 /// Pcdhgb8 /// Pcdhgc3 /// Pcdhgc4 /// Pcdhgc5	protocadherin gamma subfamily A, 1 /// protocadherin gamma subfamily A, 10 /// protocadherin gamma subfamily A, 11 /// protocadherin gamma subfamily A, 12 /// protocadherin gamma subfamily A, 2 /// protocadherin gamma subfamily A, 3 /// protocadherin gamma subfamily A, 4 /// protocadherin gamma subfamily A, 5 /// protocadherin gamma subfamily A, 6 /// protocadherin gamma subfamily A, 7 /// protoc…
9.116	Surf4	surfeit gene 4
9.084	Aplp1	amyloid beta (A4) precursor-like protein 1
9.083	Sfxn3	sideroflexin 3
9.072	Smo	smoothened homolog (Drosophila)
9.029	Oasl2	2'-5' oligoadenylate synthetase-like 2
9.007	Tfg	Trk-fused gene
8.988	Phf3	PHD finger protein 3
8.959	Myo5b	myosin VB
8.928	Usp1	ubiquitin specific peptidase 1
8.889	EG245190	predicted gene, EG245190
8.882	Serf1	small EDRK-rich factor 1
8.863	Rnf145	ring finger protein 145
8.841	Acsl4	acyl-CoA synthetase long-chain family member 4
8.615	Txn1	thioredoxin 1
8.529	Tbx18	T-box18
8.518	Cyp4v3	cytochrome P450, family 4, subfamily v, polypeptide 3
8.458	Arsb	arylsulfatase B
8.448	---	---
8.415	Stk10	serine/threonine kinase 10
8.359	Samhd1	SAM domain and HD domain, 1
8.355	Igfbp5	insulin-like growth factor binding protein 5
8.324	Snip1	Smad nuclear interacting protein 1
8.153	EG546265 /// Ube2i	predicted gene, EG546265 /// ubiquitin-conjugating enzyme E2I
8.127	Fam71d	family with sequence similarity 71, member D
8.112	Capn6	calpain 6
8.06	Zfp385a	zinc finger protein 385A
8.052	Fmo2	flavin containing monooxygenase 2
7.966	Fam116b	Family with sequence similarity 116, member B (Fam116b), mRNA
7.965	Pqlc3	PQ loop repeat containing
7.965	Seh1l	SEH1-like (S. cerevisiae
7.91	Egln2	EGL nine homolog 2 (C. elegans)
7.893	Tspan5	tetraspanin 5
7.798	Prss12	protease, serine, 12 neurotrypsin (motopsin)
7.743	EG382156	predicted gene, EG382156
7.692	Serf1	small EDRK-rich factor 1
7.671	Ube2h	ubiquitin-conjugating enzyme E2H
7.63	Gpr126	G protein-coupled receptor 126
7.625	LOC100048726 /// Sec23b	similar to SEC23B /// SEC23B (S. cerevisiae)
7.601	9530004M16Rik	RIKEN cDNA 9530004M16 gene
7.558	Mbp	myelin basic protein
7.543	AI848100	expressed sequence AI848100
7.542	Btg3 /// EG654432	B-cell translocation gene 3 /// predicted gene, EG654432
7.452	Cdca4	cell division cycle associated 4
7.411	Aplp2	amyloid beta (A4) precursor-like protein 2
7.409	Epcam	epithelial cell adhesion molecule
7.393	Atp1b1	ATPase, Na+/K+ transporting, beta 1 polypeptide
7.37	Serpinb9	serine (or cysteine) peptidase inhibitor, clade B, member 9
7.355	2310001A20Rik	RIKEN cDNA 2310001A20 gene
7.345	Dpp4	dipeptidylpeptidase 4
7.322	Klhdc3	kelch domain containing 3
7.301	Meis1	Meis homeobox 1
7.301	Apex1	apurinic/apyrimidinic endonuclease 1
7.27	Ddx5	DEAD (Asp-Glu-Ala-Asp) box polypeptide 5
7.253	Os9	amplified in osteosarcoma
7.249	Slc44a1	solute carrier family 44, member 1
7.247	Rtn3	reticulon 3
7.246	Nelf	nasal embryonic LHRH factor
7.228	---	---
7.175	Rc3h2	ring finger and CCCH-type zinc finger domains 2
7.143	Ttc3	tetratricopeptide repeat domain 3
7.124	Birc3	baculoviral IAP repeat-containing 3
7.116	Dnm3	dynamin 3
7.092	Igf2bp1	insulin-like growth factor 2 mRNA binding protein 1
7.075	Hoxa5	homeo box A5
7.017	Zfand2a	zinc finger, AN1-type domain 2A
7.01	Tpd52	tumor protein D52
6.927	Hnrnpd	heterogeneous nuclear ribonucleoprotein D
6.925	Avl9	AVL9 homolog (S. cerevisiase)
6.893	Usp14	Ubiquitin specific peptidase 14, mRNA (cDNA clone MGC:7106 IMAGE:3157723)
6.89	Gbp3	guanylate binding protein 3
6.884	Ywhab	tyrosine 3-monooxygenase/tryptophan 5-monooxygenase activation protein, beta polypeptide
6.853	Sf3b4	splicing factor 3b, subunit 4
6.841	Cno	cappuccino
6.831	Trim33	tripartite motif-containing 33
6.827	Ano6	anoctamin 6
6.808	Hexim1	hexamethylene bis-acetamide inducible 1
6.791	Dync1i2	dynein cytoplasmic 1 intermediate chain 2
6.773	Kcnh3	potassium voltage-gated channel, subfamily H (eag-related), member 3
6.738	Col8a1	collagen, type VIII, alpha 1
6.733	Trim34	tripartite motif-containing 34
6.72	Ucp2	uncoupling protein 2 (mitochondrial, proton carrier)
6.685	Adamts8 /// LOC100047263	a disintegrin-like and metallopeptidase (reprolysin type) with thrombospondin type 1 motif, 8 /// similar to a disintegrin-like and metalloprotease (reprolysin type) with thrombospondin type 1 motif, 8
6.635	---	---
6.623	Lasp1	LIM and SH3 protein 1
6.582	---	---
6.572	Psip1	PC4 and SFRS1 interacting protein 1
6.571	D13Ertd787e	DNA segment, Chr 13, ERATO Doi 787, expressed
6.559	Atp7a	ATPase, Cu++ transporting, alpha polypeptide
6.555	---	---
6.55	Ucp2	uncoupling protein 2 (mitochondrial, proton carrier)
6.538	LOC640502 /// Uap1	similar to UDP-N-acetylhexosamine pyrophosphorylase /// UDP-N-acetylglucosamine pyrophosphorylase 1
6.501	Cct4	chaperonin containing Tcp1, subunit 4 (delta)
6.407	Ptgr2	prostaglandin reductase 2
6.406	Rfx5	regulatory factor X, 5 (influences HLA class II expression)
6.403	Adarb1	adenosine deaminase, RNA-specific, B1
6.384	---	---
6.378	Rangap1	RAN GTPase activating protein 1
6.365	Tnfrsf12a	tumor necrosis factor receptor superfamily, member 12a
6.359	Ssb	Sjogren syndrome antigen B
6.357	H2-Aa	histocompatibility 2, class II antigen A, alpha
6.354	Rab6b	RAB6B, member RAS oncogene family
6.351	Rnf213	ring finger protein 213
6.332	Tcf3	transcription factor 3
6.28	Dnajc21	DnaJ (Hsp40) homolog, subfamily C, member 21
6.274	Slc7a4	solute carrier family 7 (cationic amino acid transporter, y+ system), member 4
6.269	Igbp1	immunoglobulin (CD79A) binding protein 1
6.266	Arrb2	arrestin, beta 2
6.26	Taok2	TAO kinase 2
6.246	Nxf1	nuclear RNA export factor 1 homolog (S. cerevisiae)
6.212	---	---
6.186	Tnrc6a	trinucleotide repeat containing 6a
6.169	Sgpp1	sphingosine-1-phosphate phosphatase 1
6.167	Rps6ka4	ribosomal protein S6 kinase, polypeptide 4
6.145	Retnla	resistin like alpha
6.145	Arhgap18	Rho GTPase activating protein 18
6.141	Ngfrap1	nerve growth factor receptor (TNFRSF16) associated protein 1
6.135	4921517O11Rik	RIKEN cDNA 4921517O11 gene
6.122	Cpt1a	carnitine palmitoyltransferase 1a, liver
6.119	Gls	glutaminase
6.076	Bace2	beta-site APP-cleaving enzyme 2
6.059	LOC100048168 /// Sav1	similar to WW45 protein /// salvador homolog 1 (Drosophila)
6.05	Jak2	Janus kinase 2
6.034	Gpr162	G protein-coupled receptor 162
6.032	5430433E21Rik	RIKEN cDNA 5430433E21 gene
6.022	Scrt2	scratch homolog 2, zinc finger protein (Drosophila)
6.007	Pskh1	protein serine kinase H1
6.006	LOC100046168 /// Ndfip1	similar to Nedd4 WW domain-binding protein 5 /// Nedd4 family interacting protein 1
6.002	Ern1	Endoplasmic reticulum (ER) to nucleus signalling 1 (Ern1), mRNA
5.991	Vps54	vacuolar protein sorting 54 (yeast)
5.988	Pisd	phosphatidylserine decarboxylase
5.985	Tia1	cytotoxic granule-associated RNA binding protein 1
5.983	Sumf1	sulfatase modifying factor 1
5.968	Pip4k2a	phosphatidylinositol-5-phosphate 4-kinase, type II, alpha
5.959	Cxadr	coxsackie virus and adenovirus receptor
5.952	Tnrc6a	trinucleotide repeat containing 6a
5.948	Atl3	atlastin GTPase 3
5.942	Hdc	histidine decarboxylase
5.923	Gng3	guanine nucleotide binding protein (G protein), gamma 3
5.917	Myo10	myosin X
5.908	Uspl1	ubiquitin specific peptidase like 1
5.901	Trim27	tripartite motif-containing 27
5.897	Rab38	RAB38, member of RAS oncogene family
5.895	Gbp6	guanylate binding protein 6
5.832	H2afy2 /// H2afy3	H2A histone family, member Y2 /// H2A histone family, member Y3
5.807	Lce3b	late cornified envelope 3B
5.803	Sft2d2	SFT2 domain containing 2
5.788	Rag1ap1	recombination activating gene 1 activating protein 1
5.772	Hyou1	hypoxia up-regulated 1
5.759	---	---
5.733	OTTMUSG00000014892 /// Trappc6b	predicted gene, OTTMUSG00000014892 /// trafficking protein particle complex 6B
5.701	Pvr	poliovirus receptor
5.699	Cyfip1 /// Nipa2	cytoplasmic FMR1 interacting protein 1 /// non imprinted in Prader-Willi/Angelman syndrome 2 homolog (human)
5.697	Fyb	FYN binding protein
5.691	9530028C05	hypothetical protein 9530028C05
5.677	C030046I01Rik	RIKEN cDNA C030046I01 gene
5.655	Safb	scaffold attachment factor B
5.64	Nr4a1	nuclear receptor subfamily 4, group A, member 1
5.621	6720469N11Rik	RIKEN cDNA 6720469N11 gene
5.608	Gnai1	guanine nucleotide binding protein (G protein), alpha inhibiting 1
5.601	1810007M14Rik	RIKEN cDNA 1810007M14 gene
5.595	2310051F07Rik	RIKEN cDNA 2310051F07 gene
5.589	Pea15a	phosphoprotein enriched in astrocytes 15A
5.585	EG385344 /// EG627427 /// EG665516 /// EG666036 /// EG666422 /// EG666875 /// EG668506 /// EG668576 /// EG668771 /// LOC630761 /// LOC630896 /// OTTMUSG00000011498 /// Phgdh	predicted gene, EG385344 /// predicted gene, EG627427 /// predicted gene, EG665516 /// predicted gene, EG666036 /// predicted gene, EG666422 /// predicted gene, EG666875 /// predicted gene, EG668506 /// predicted gene, EG668576 /// predicted gene, EG668771 /// similar to 3-phosphoglycerate dehydrogenase /// similar to 3-phosphoglycerate dehydrogenase /// predicted gene, OTTMUSG00000011498 /// 3-p…
5.583	Armc10	armadillo repeat containing 10
5.581	1700036D21Rik	RIKEN cDNA 1700036D21 gene
5.578	Rnf103	ring finger protein 103
5.574	---	---
5.567	Stard5	StAR-related lipid transfer (START) domain containing 5
5.566	Star	steroidogenic acute regulatory protein
5.564	Rhpn2	rhophilin, Rho GTPase binding protein 2
5.549	Wbp4	WW domain binding protein 4
5.547	Il18r1	interleukin 18 receptor 1
5.537	---	---
5.525	Igf1	insulin-like growth factor 1
5.521	Opa3	optic atrophy 3 (human)
5.51	Snord123	small nucleolar RNA, C/D box 123
5.499	Efnb2	ephrin B2
5.478	Lasp1	LIM and SH3 protein 1
5.474	---	---
5.471	Ptprd	protein tyrosine phosphatase, receptor type, D
5.467	Hbp1	high mobility group box transcription factor 1
5.463	Zfp444	zinc finger protein 444
5.447	100039556 /// 100039840 /// 100040109 /// 100041204 /// 100041236 /// 100042148 /// 100043724 /// 640374 /// 671215 /// EG433184 /// EG435963 /// EG546736 /// EG665129 /// EG665233 /// EG666891 /// EG667204 /// EG668018 /// EG668242 /// ENSMUSG00000070025 /// ENSMUSG00000072432 /// ENSMUSG00000073737 /// Gapdh /// LOC100039762 /// LOC100044454 /// LOC100044981 /// LOC100045908 /// LOC100047352 //…	predicted gene, 100039556 /// predicted gene, 100039840 /// predicted gene, 100040109 /// predicted gene, 100041204 /// predicted gene, 100041236 /// predicted gene, 100042148 /// predicted gene, 100043724 /// predicted gene, 640374 /// predicted gene, 671215 /// predicted gene, EG433184 /// predicted gene, EG435963 /// predicted gene, EG546736 /// predicted gene, EG665129 /// predicted gene, EG6…
5.442	Wbp2nl	WBP2 N-terminal like
5.441	---	---
5.436	---	---
5.426	Cux1	cut-like homeobox 1
5.425	Ncapg2	non-SMC condensin II complex, subunit G2
5.41	LOC14210	hypothetical LOC14210
5.394	Usp32	ubiquitin specific peptidase 32
5.39	Sephs1	selenophosphate synthetase 1
5.382	Fnbp1	formin binding protein 1
5.362	Csdc2	cold shock domain containing C2, RNA binding
5.361	Nucks1	nuclear casein kinase and cyclin-dependent kinase substrate 1
5.358	Dtx2	deltex 2 homolog (Drosophila)
5.358	Clca2	chloride channel calcium activated 2
5.35	Syap1	synapse associated protein 1
5.337	Ap3m1	adaptor-related protein complex 3, mu 1 subunit
5.334	Efnb2	ephrin B2
5.326	Terf2	telomeric repeat binding factor 2
5.324	Ggnbp2	gametogenetin binding protein 2
5.315	Lsm5	LSM5 homolog, U6 small nuclear RNA associated (S. cerevisiae)
5.281	Rassf1	Ras association (RalGDS/AF-6) domain family member 1
5.278	Prkca	protein kinase C, alpha
5.272	A130040M12Rik	RIKEN cDNA A130040M12 gene
5.272	Centb1 /// LOC100045877	centaurin, beta 1 /// similar to Centaurin, beta 1
5.264	E430010N07Rik	RIKEN cDNA E430010N07 gene
5.259	Lsr	lipolysis stimulated lipoprotein receptor
5.248	Zdbf2	zinc finger, DBF-type containing 2
5.245	Tgfb1i1	transforming growth factor beta 1 induced transcript 1
5.241	Hpcal1	hippocalcin-like 1
5.229	Sorbs3	sorbin and SH3 domain containing 3
5.223	Sil1	endoplasmic reticulum chaperone SIL1 homolog (S. cerevisiae)
5.22	Sec63	SEC63-like (S. cerevisiae)
5.219	Calm3	calmodulin 3
5.208	Pdcl	phosducin-like
5.204	Nr4a3	nuclear receptor subfamily 4, group A, member 3
5.193	Wt1	Wilms tumor 1 homolog
5.191	Ttll4	tubulin tyrosine ligase-like family, member 4
5.182	Wee1	WEE 1 homolog 1 (S. pombe)
5.179	---	---
5.163	Zcchc3	zinc finger, CCHC domain containing 3
5.161	Ccdc64	coiled-coil domain containing 64
5.149	Efna5	ephrin A5
5.135	S1pr2	sphingosine-1-phosphate receptor 2
5.132	Stap2	signal transducing adaptor family member 2
5.124	Actr1a	ARP1 actin-related protein 1 homolog A, centractin alpha (yeast)
5.122	---	---
5.119	1600012H06Rik	RIKEN cDNA 1600012H06 gene
5.117	Iars2	isoleucine-tRNA synthetase 2, mitochondrial
5.108	Ssbp3	single-stranded DNA binding protein 3
5.099	Uhrf1bp1l	UHRF1 (ICBP90) binding protein 1-like
5.078	Spaca3	sperm acrosome associated 3
5.078	Nes	nestin
5.073	Ctse	cathepsin E
5.066	Vcam1	vascular cell adhesion molecule 1
5.046	Itpr2	inositol 1,4,5-triphosphate receptor 2
5.038	Irf9	interferon regulatory factor 9
5.034	Ddx58	DEAD (Asp-Glu-Ala-Asp) box polypeptide 58
5.031	Ifi203	interferon activated gene 203
5.028	Aym1	activator of yeast meiotic promoters 1
5.025	Nhsl1	NHS-like 1
4.992	Sfrs2	splicing factor, arginine/serine-rich 2 (SC-35)
4.986	Trove2	TROVE domain family, member 2
4.975	Irx1	Iroquois related homeobox 1 (Drosophila)
4.967	Inpp5f	inositol polyphosphate-5-phosphatase F
4.956	Unc119b	unc-119 homolog B (C. elegans)
4.95	Mboat7	membrane bound O-acyltransferase domain containing 7
4.946	Rnf111	ring finger 111
4.942	Zfp830	zinc finger protein 830
4.938	---	---
4.916	Chuk	conserved helix-loop-helix ubiquitous kinase
4.912	Ncbp2	nuclear cap binding protein subunit 2
4.905	Prrg3	proline rich Gla (G-carboxyglutamic acid) 3 (transmembrane)
4.905	Igsf3	immunoglobulin superfamily, member 3
4.902	Dstyk	dual serine/threonine and tyrosine protein kinase
4.899	Atp8b2	ATPase, class I, type 8B, member 2
4.893	Gpr177	G protein-coupled receptor 177
4.892	Cpt1a	carnitine palmitoyltransferase 1a, liver
4.891	---	---
4.884	Spsb1	splA/ryanodine receptor domain and SOCS box containing 1
4.879	Eny2	enhancer of yellow 2 homolog (Drosophila)
4.867	Psip1	PC4 and SFRS1 interacting protein 1
4.849	Ptpn13	protein tyrosine phosphatase, non-receptor type 13
4.841	1190007F08Rik	RIKEN cDNA 1190007F08 gene
4.831	Topors	topoisomerase I binding, arginine/serine-rich
4.821	---	---
4.81	---	---
4.805	Cybasc3	cytochrome b, ascorbate dependent 3
4.803	Ppm1h	protein phosphatase 1H (PP2C domain containing)
4.768	Sf4	splicing factor 4
4.765	1810031K17Rik	RIKEN cDNA 1810031K17 gene
4.757	BC033915	cDNA sequence BC033915
4.746	Cdkn2c	cyclin-dependent kinase inhibitor 2C (p18, inhibits CDK4)
4.741	6430527G18Rik	RIKEN cDNA 6430527G18 gene
4.74	EG631624	predicted gene, EG631624
4.722	2700089E24Rik	RIKEN cDNA 2700089E24 gene
4.714	AI413194	expressed sequence AI413194
4.711	Kcnt2	potassium channel, subfamily T, member 2
4.702	Zmat2	zinc finger, matrin type 2
4.695	Lce1d	late cornified envelope 1D
4.693	Crls1	cardiolipin synthase 1
4.69	Ttyh3	tweety homolog 3 (Drosophila)
4.687	LOC100045795 /// Rsbn1	similar to mKIAA3002 protein /// rosbin, round spermatid basic protein 1
4.685	1110059E24Rik	RIKEN cDNA 1110059E24 gene
4.675	Sptlc1	serine palmitoyltransferase, long chain base subunit 1
4.672	Ptpn6	protein tyrosine phosphatase, non-receptor type 6
4.671	LOC545261	hypothetical protein LOC545261
4.665	D10Ertd610e	DNA segment, Chr 10, ERATO Doi 610, expressed
4.656	Mfsd11	major facilitator superfamily domain containing 11
4.632	Mylip	myosin regulatory light chain interacting protein
4.63	Fmr1	fragile X mental retardation syndrome 1 homolog
4.629	Psd3	pleckstrin and Sec7 domain containing 3
4.621	Cstf3	cleavage stimulation factor, 3' pre-RNA, subunit 3
4.614	Sfrs8	splicing factor, arginine/serine-rich 8
4.604	Ankrd40	ankyrin repeat domain 40
4.597	LOC100044404 /// LOC100046282 /// Selk	similar to Selenoprotein K /// similar to Selenoprotein K /// selenoprotein K
4.596	Pdgfc	platelet-derived growth factor, C polypeptide
4.58	---	---
4.579	Acaa1a	acetyl-Coenzyme A acyltransferase 1A
4.575	Acaca	acetyl-Coenzyme A carboxylase alpha
4.573	Pik3c2a	phosphatidylinositol 3-kinase, C2 domain containing, alpha polypeptide
4.569	Cramp1l	Crm, cramped-like (Drosophila)
4.556	---	---
4.554	Sec14l1	SEC14-like 1 (S. cerevisiae)
4.551	Cpsf6	cleavage and polyadenylation specific factor 6
4.549	Brd1	bromodomain containing 1
4.549	Atp6v1h	ATPase, H+ transporting, lysosomal V1 subunit H
4.545	Kdm5c	lysine (K)-specific demethylase 5C
4.545	Cmklr1	chemokine-like receptor 1
4.532	Sox21	SRY-box containing gene 21
4.508	Ddx5	DEAD (Asp-Glu-Ala-Asp) box polypeptide 5
4.506	Serpinb1a	serine (or cysteine) peptidase inhibitor, clade B, member 1a
4.506	Zfp830	zinc finger protein 830
4.506	Fmod	fibromodulin
4.505	Calm1	calmodulin 1
4.498	Zfp281	zinc finger protein 281
4.493	Phc3	polyhomeotic-like 3 (Drosophila)
4.49	Msx1	homeobox, msh-like 1
4.48	Noc4l	nucleolar complex associated 4 homolog (S. cerevisiae)
4.475	Rfc2	replication factor C (activator 1) 2
4.456	Fzd10	frizzled homolog 10 (Drosophila)
4.455	Flrt2	fibronectin leucine rich transmembrane protein 2
4.444	Creb3	cAMP responsive element binding protein 3
4.43	Fam110c	family with sequence similarity 110, member C
4.426	---	---
4.412	H2-D1	histocompatibility 2, D region locus 1
4.409	Chmp6	chromatin modifying protein 6
4.406	Casp14	Caspase 14 (Casp14), mRNA
4.402	Slc7a6	solute carrier family 7 (cationic amino acid transporter, y+ system), member 6
4.398	Myst2	MYST histone acetyltransferase 2
4.393	Ttll3	tubulin tyrosine ligase-like family, member 3
4.391	Actl6a	actin-like 6A
4.387	Cachd1	cache domain containing 1
4.381	Has1	hyaluronan synthase1
4.38	Il17ra	interleukin 17 receptor A
4.376	---	---
4.372	Alas2	aminolevulinic acid synthase 2, erythroid
4.363	Cmpk2	cytidine monophosphate (UMP-CMP) kinase 2, mitochondrial
4.361	Wnt9a	wingless-type MMTV integration site 9A
4.355	Sfrs16	splicing factor, arginine/serine-rich 16
4.351	Ptpn1	protein tyrosine phosphatase, non-receptor type 1
4.348	Tjp2	tight junction protein 2
4.34	Rpl14	ribosomal protein L14
4.334	Fkbp8	FK506 binding protein 8
4.33	---	---
4.318	Cplx2	complexin 2
4.307	Clca1	chloride channel calcium activated 1
4.305	Ppp3ca	protein phosphatase 3, catalytic subunit, alpha isoform
4.303	Marcksl1	MARCKS-like 1
4.3	Llph	LLP homolog, long-term synaptic facilitation (Aplysia)
4.299	Irf1	interferon regulatory factor 1
4.298	Nup54	nucleoporin 54
4.288	Pafah2	platelet-activating factor acetylhydrolase 2
4.288	Kdm3b	KDM3B lysine (K)-specific demethylase 3B
4.282	Ang2	angiogenin, ribonuclease A family, member 2
4.273	Actr1b	ARP1 actin-related protein 1 homolog B, centractin beta (yeast)
4.271	Cpsf6	cleavage and polyadenylation specific factor 6
4.268	Casc4	cancer susceptibility candidate 4
4.26	Tpx2	TPX2, microtubule-associated protein homolog (Xenopus laevis)
4.255	2310057M21Rik	RIKEN cDNA 2310057M21 gene
4.253	0610037M15Rik	RIKEN cDNA 0610037M15 gene
4.248	Aplp2	amyloid beta (A4) precursor-like protein 2
4.228	Daglb	diacylglycerol lipase, beta
4.225	Gemin7	gem (nuclear organelle) associated protein 7
4.203	Fam115a	family with sequence similarity 115, member A
4.2	2700097O09Rik	RIKEN cDNA 2700097O09 gene
4.2	Eif4b	eukaryotic translation initiation factor 4B
4.198	---	---
4.188	Cetn4	centrin 4
4.186	---	---
4.185	Pxn	paxillin
4.177	Hmmr	hyaluronan mediated motility receptor (RHAMM)
4.171	Ifi203	interferon activated gene 203
4.17	Rabif	RAB interacting factor (Rabif), mRNA
4.149	Ypel2	yippee-like 2 (Drosophila)
4.144	---	---
4.136	Tug1	taurine upregulated gene 1
4.135	5930436O19Rik	RIKEN cDNA 5930436O19 gene
4.133	U2af2	U2 small nuclear ribonucleoprotein auxiliary factor (U2AF) 2
4.13	Rdh18	retinol dehydrogenase 18
4.128	Ccdc132	coiled-coil domain containing 132
4.125	Pear1	platelet endothelial aggregation receptor 1
4.116	Ttll12	tubulin tyrosine ligase-like family, member 12
4.103	Casp2	caspase 2
4.099	Atp2c1	ATPase, Ca++-sequestering
4.098	Zcchc14	zinc finger, CCHC domain containing 14
4.096	Cyp2c54	cytochrome P450, family 2, subfamily c, polypeptide 54
4.096	Uba5	ubiquitin-like modifier activating enzyme 5
4.095	Arid4b	AT rich interactive domain 4B (RBP1-like)
4.095	Mpzl2	myelin protein zero-like 2
4.092	Psap	prosaposin
4.086	Ap4e1	adaptor-related protein complex AP-4, epsilon 1
4.083	Lcorl	Mlr1 mRNA for transcription factor MLR1
4.082	Zkscan1	zinc finger with KRAB and SCAN domains 1
4.077	---	---
4.072	Speer3	spermatogenesis associated glutamate (E)-rich protein 3
4.069	Sfrs12ip1	SFRS12-interacting protein 1
4.065	Galnt6 /// LOC100047499	UDP-N-acetyl-alpha-D-galactosamine:polypeptide N-acetylgalactosaminyltransferase 6 /// similar to UDP-N-acetyl-alpha-D-galactosamine:polypeptide N-acetylgalactosaminyltransferase 6
4.063	Plekha2	pleckstrin homology domain-containing, family A (phosphoinositide binding specific) member 2
4.06	Gcap14	granule cell antiserum positive 14
4.051	Rarg	retinoic acid receptor, gamma
4.048	---	---
4.04	1110020C03Rik	RIKEN cDNA 1110020C03 gene
4.036	Fbxw16	F-box and WD-40 domain protein 16
4.034	Ahctf1	AT hook containing transcription factor 1
4.029	Slc35a5	solute carrier family 35, member A5
4.027	Cd209f	CD209f antigen
4.025	---	---
4.024	Disp1	dispatched homolog 1 (Drosophila)
4.023	Uroc1	urocanase domain containing 1
4.021	Zfyve19	zinc finger, FYVE domain containing 19
4.016	Zdhhc9	zinc finger, DHHC domain containing 9
4.001	1810019J16Rik	RIKEN cDNA 1810019J16 gene
4	Plekha3	pleckstrin homology domain-containing, family A (phosphoinositide binding specific) member 3
